# Supplementary material
Source: PubMed Central journal article supplement (PMC4136508)
Supplement: NIHMS601431-supplement-Supplementary_data.pdf [file NIHMS601431-supplement-Supplementary_data.pdf]

## Supplementary figure legends

**Figure S1, related to Figure 1.** *Relationship between  $P(\text{collision})$ , read depth and immune status.* **(A)**  $P(\text{collision})$  values are shown in relation to the number of unique mapped and filtered sequences for each sample (colored by sample type). **(B)** Number of unique sequences per sample, binned by sample type. Annotations to each plot show the 25<sup>th</sup>-75<sup>th</sup> percentiles (box), the 10<sup>th</sup>-90<sup>th</sup> percentiles (whiskers), and the median (horizontal line). **(C, D)** Paired values for  $P(\text{collision})$  in acute and convalescent (*left panel*), or acute and post-convalescent (*middle panel*), or convalescent and post-convalescent (*right panel*) phase samples from individuals presenting with **(C)** primary or **(D)** secondary DENV infections. **\*\* $P < 0.0001$**  (acute vs. P-Conv; Wilcoxon Signed Rank), **\* $P = 0.0046$**  (Conv vs. P-Conv; Wilcoxon Signed Rank).

**Figure S2, related to Figure 2.** *Identification of prevalent CDR3 regions.* **(A)** Random assignment of individuals to two distinct groups for cross-validation. **(B)** Highly prevalent CDR3 regions in acute dengue cases in the training set. **(C)** Sequencing read depth in samples categorized by presence or absence of the prevalent 13-mer CDR3, 'ARLD(Y)<sub>5</sub>GMDL.' Annotations to each plot show the 25<sup>th</sup>-75<sup>th</sup> percentiles (box), the 10<sup>th</sup>-90<sup>th</sup> percentiles (whiskers), and the median (horizontal line). **(D)** CDR3 regions identified as being highly prevalent in the 1<sup>st</sup> Test Set. Prevalence is measured as the proportion of samples containing the CDR3 regions of interest. Each horizontal panel shows the prevalence of a CDR3 sequence in acute, convalescent and post-convalescent phase samples and in 8 non-dengue febrile cases ('febrile') and 46 healthy individuals. **(E)** BLOSUM62-like amino acid similarity scoring matrix. **(F)** Prevalent CDR3 regions that were identified using the amino acid similarity-based cross-validation. *Upper panel:* CDR3 prevalence in acute phase samples partitioned for cross-validation or by DENV serotype. *Lower panel:* prevalence in samples from 47 healthy individuals and 8 individuals with non-dengue febrile illness (Non-dengue), and in post-convalescent phase samples partitioned for cross-validation or partitioned by DENV serotype. **(G)** Ages of individuals with zero mismatch (0MM) ARLD(Y)<sub>5</sub>GMDL CDR3 signatures and their one-mismatch derivatives (1MM) at time of sampling, compared to the ages of all individuals included in this study. Annotations to each plot show the 25<sup>th</sup>-75<sup>th</sup> percentiles (box), the 10<sup>th</sup>-90<sup>th</sup> percentiles (whiskers), and the median (horizontal line).

**Figure S3, related to Figure 3.** *Properties of prevalent CDR3 regions.* **(A)** Percent relative abundance of prevalent CDR3 regions that were identified by mismatch cross-validation. CDR3

regions are binned by the number of amino acid mismatches (0MM or 1MM) to the indicated parent sequence. Annotations to each plot show the 25<sup>th</sup>-75<sup>th</sup> percentiles (box), the 10<sup>th</sup>-90<sup>th</sup> percentiles (whiskers), and the median (horizontal line). **(B-E)** Nucleotide sequences encoding for convergent CDR3 regions. Sequences are segregated by patient identity and sample type (A, Acute; C, Convalescent; PC, Post-convalescent). #, count per sample; CON, Consensus; V, Variable region; D, Diversity region; N, non-templated additions; J, Joining region. **(F)** V genes used in encoding for the convergent CDR3 regions and their one-mismatch derivatives. Only V genes with evidence for usage in at least two samples are shown. **(G-H)** Deviations from germline nucleotide sequence in reads encoding for convergent CDR3 regions. Frequency distribution of percent mutation in V<sub>H</sub> segments encoding for **(G)** convergent 10-mer and 13-mer CDR3 regions, compared to **(H)** baseline percent mutation distributions in similar V<sub>H</sub> segments that encode for other CDR3 regions in these individuals. **(I)** Percent prevalence of convergent CDR3 regions in primary and secondary dengue cases. \**P* < 0.05, \*\**P* < 0.005 for comparisons between acute primary and acute secondary (Fisher's test).

**Figure S4, related to Figure 4.** *Possible V<sub>H</sub> phylogenies for B cells with convergent 13-mer CDR3 regions.* Phylogenies are shown for reads derived from **(A-B)** IGHV1-46 and IGHJ6, and **(C-E)** IGHV5-51 and IGHJ6 genes for various individuals, along with the number of nucleotide changes between any two nodes. The sizes of the circles represent the number of reads. Reads that encode for ARID(Y)<sub>5</sub>GMDL and ARLD(Y)<sub>5</sub>GMDL CDR3 regions and their derivatives with ≥95% similarity or 90-95% similarity are highlighted using red, orange and green boxes, respectively. *Methods:* A probabilistic generative model was used to assign a probability to each possible phylogeny. Markov Chain Monte Carlo (MCMC) was applied to sample this probability distribution over all possible phylogenies subject to the constraint that the phylogeny must generate the observed empirical heavy chain reads. Per MCMC iteration, block Gibbs sampling was performed on each of the following parameters: phylogenetic tree structure, birth and death times of individual subclones, birth and death rates, mutation rates, read error rates, subclone consensus sequences, and assignment of reads to subclones. The sampled trees were then optimized, and the most optimized sample was selected as the final representative output.

**Figure S5, related to Figure 5.** *Prevalence and physicochemical properties of clusters associated with convergent CDR3 regions.* **(A)** Percent prevalence of clusters associated with the convergent 10-mer and 13-mer CDR3 regions in various sample subsets. **(B, C)** Residue-specific properties of 10-mer and 13-mer clusters containing the convergent CDR3 regions and

their associated CDR2 and CDR1 regions. Scores for molecular weight (top line plot), isoelectric pH (center line plot) or hydrophilicity (bottom line plot). Purple line, scores for germline CDR1 and CDR2 sequences (middle and right panels) or median scores across all CDR3 regions of length **(B)** 10 or **(C)** 13 (left panels); thick orange line, median scores across all members of the cluster; faded orange lines, scores for individual members of the cluster. Observed frequencies of association between CDR3 and CDR1 or CDR2 clusters are shown (freq), as well as the extent of amino acid conservation and consensus peptide sequences for the CDR clusters.

**S1A**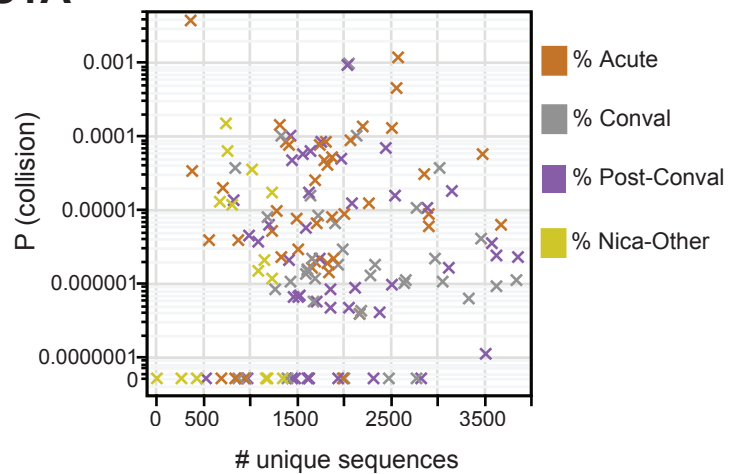**S1B**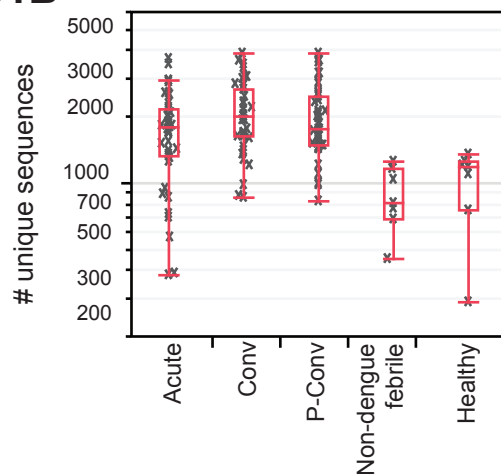**S1C**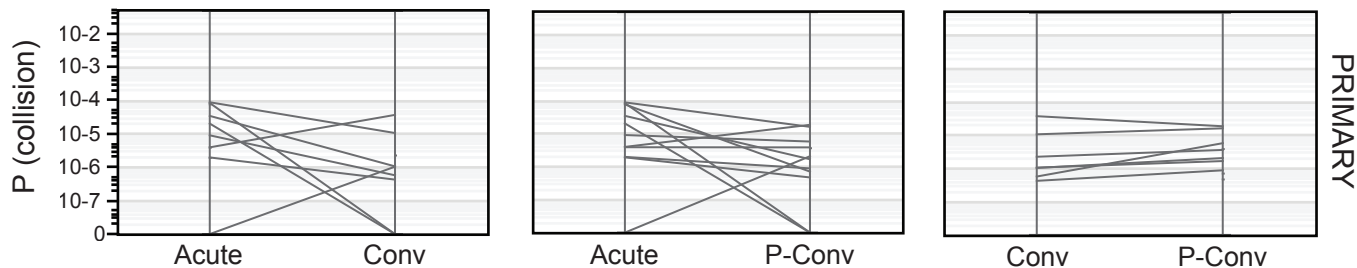**S1D**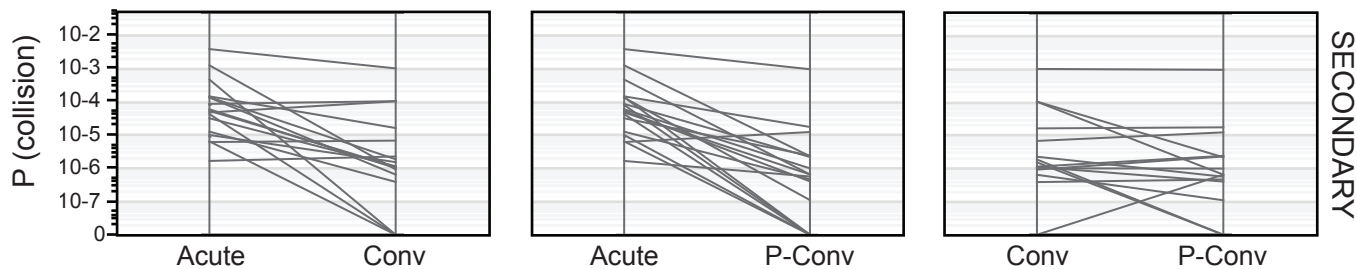

## S2A

| Group          |           | Training set | Testing set |
|----------------|-----------|--------------|-------------|
| # dengue cases |           | 22           | 22          |
| Immune status  | Primary   | 12           | 10          |
|                | Secondary | 10           | 12          |
| DENV serotype  | DENV-2    | 14           | 8           |
|                | DENV-3    | 8            | 14          |
| Diagnosis      | DF        | 11           | 12          |
|                | DHF/DSS   | 11           | 10          |

## S2B

| CDR3          | Proportion (Acute) | Proportion (Conv) | Proportion (P-Conv) |
|---------------|--------------------|-------------------|---------------------|
| ARIDYYYYYGMDL | 0.36               | 0.05              | 0                   |
| ARLDYHNYGMDV  | 0.36               | 0.05              | 0                   |
| ARLDYYYYYGMDI | 0.36               | 0.11              | 0.05                |
| ARLDYYYYYGMDL | 0.41               | 0.11              | 0.05                |
| ARQIGNWFDP    | 0.41               | 0.11              | 0.09                |
| ARLDYHYYGMDV  | 0.36               | 0.16              | 0.09                |
| ARIDYYYYYGMDV | 0.45               | 0.26              | 0.18                |
| ARGGYYGMDV    | 0.36               | 0.37              | 0.23                |
| ARLDYYYYYGMDV | 0.45               | 0.26              | 0.23                |
| ARGRGMDV      | 0.36               | 0.05              | 0.27                |

## S2C

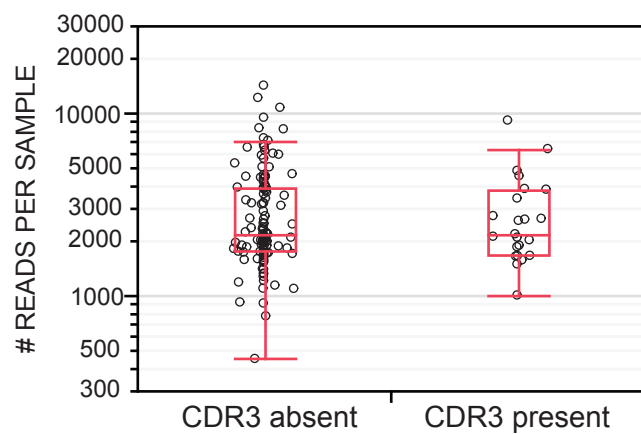

## S2D

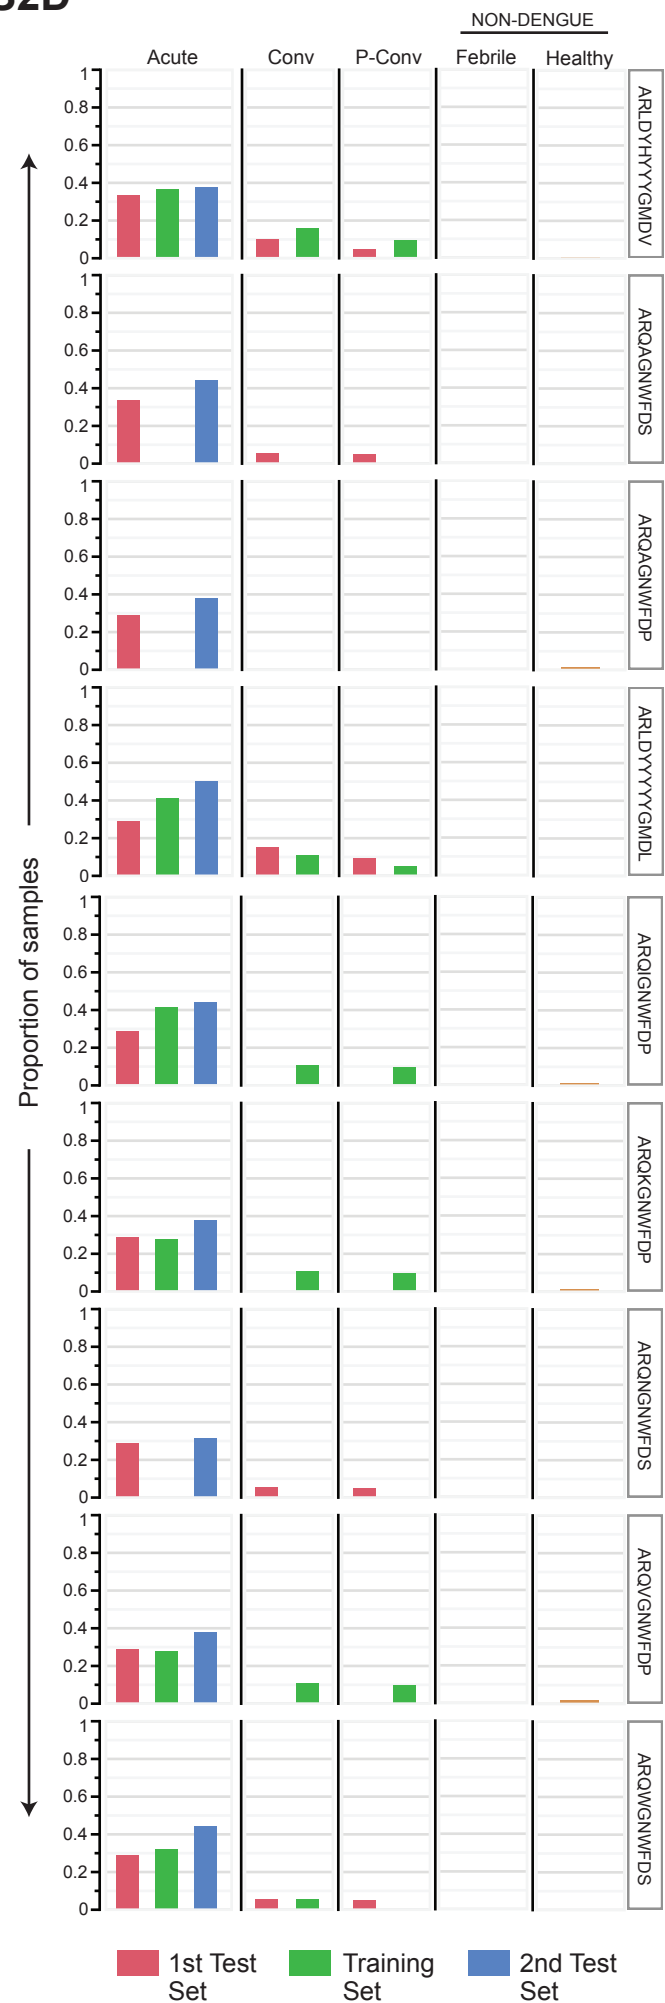

## S2E

|   | C  | S  | T  | P  | A  | G  | N  | D  | E  | Q  | H  | R  | K  | M  | I  | L  | V  | F | Y | W |
|---|----|----|----|----|----|----|----|----|----|----|----|----|----|----|----|----|----|---|---|---|
| C | 9  |    |    |    |    |    |    |    |    |    |    |    |    |    |    |    |    |   |   |   |
| S | -1 | 4  |    |    |    |    |    |    |    |    |    |    |    |    |    |    |    |   |   |   |
| T | -1 | 3  | 5  |    |    |    |    |    |    |    |    |    |    |    |    |    |    |   |   |   |
| P | -4 | -2 | -1 | 7  |    |    |    |    |    |    |    |    |    |    |    |    |    |   |   |   |
| A | 0  | 1  | 0  | -1 | 4  |    |    |    |    |    |    |    |    |    |    |    |    |   |   |   |
| G | -4 | 0  | -2 | -1 | 0  | 6  |    |    |    |    |    |    |    |    |    |    |    |   |   |   |
| N | -3 | 1  | 1  | -2 | 0  | -1 | 6  |    |    |    |    |    |    |    |    |    |    |   |   |   |
| D | -3 | -1 | -1 | -2 | -2 | -1 | 0  | 6  |    |    |    |    |    |    |    |    |    |   |   |   |
| E | -4 | -1 | -1 | -2 | -1 | -1 | 0  | 3  | 5  |    |    |    |    |    |    |    |    |   |   |   |
| Q | -3 | 1  | 0  | -1 | 0  | -2 | 2  | 0  | 1  | 5  |    |    |    |    |    |    |    |   |   |   |
| H | -4 | -2 | -2 | -2 | -1 | -2 | 0  | -1 | -1 | 0  | 8  |    |    |    |    |    |    |   |   |   |
| R | -4 | -2 | -1 | -3 | -1 | -2 | 0  | -2 | -2 | 0  | 2  | 6  |    |    |    |    |    |   |   |   |
| K | -4 | -2 | -1 | -2 | -1 | -2 | 0  | -2 | -1 | 0  | 2  | 4  | 6  |    |    |    |    |   |   |   |
| M | -1 | 0  | -1 | -1 | -1 | -3 | -1 | -2 | -1 | 0  | -2 | -2 | -1 | 5  |    |    |    |   |   |   |
| I | -1 | -1 | -1 | -2 | -1 | -2 | -1 | 2  | -4 | -2 | -2 | -3 | -2 | -2 | 4  |    |    |   |   |   |
| L | -1 | -1 | -1 | -2 | -1 | -4 | -2 | -3 | -2 | -2 | -3 | -2 | -2 | 2  | 2  | 4  |    |   |   |   |
| V | -1 | -1 | 0  | -1 | 2  | -3 | -2 | -2 | -1 | -2 | -3 | -2 | -2 | 2  | 3  | 3  | 4  |   |   |   |
| F | -2 | -1 | -2 | -3 | -2 | -3 | -2 | -2 | -4 | -3 | -2 | -2 | -3 | 0  | 1  | 0  | -1 | 6 |   |   |
| Y | -2 | -1 | -2 | -2 | -2 | -3 | -1 | -2 | -3 | -1 | 0  | -2 | -2 | -1 | 0  | -1 | 1  | 4 | 6 |   |
| W | -2 | -2 | -2 | -3 | -3 | -4 | -3 | -4 | -4 | -2 | -2 | -2 | -3 | -1 | -1 | -2 | 0  | 2 | 3 | 9 |

## S2F

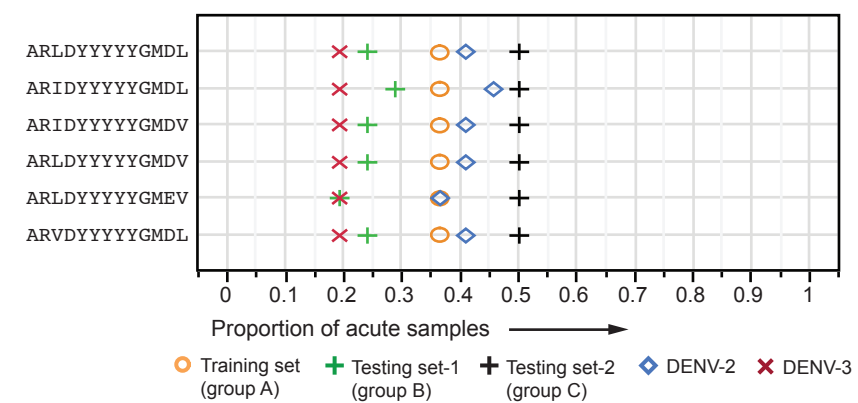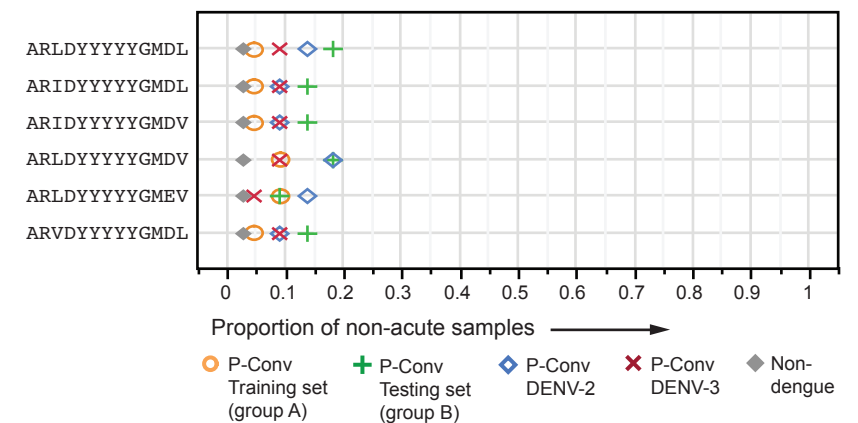

## S2G

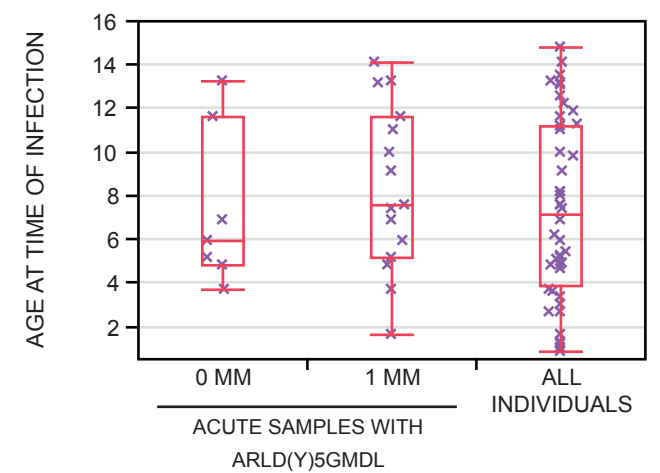



# S4A

## Sample # 287 [Acute]

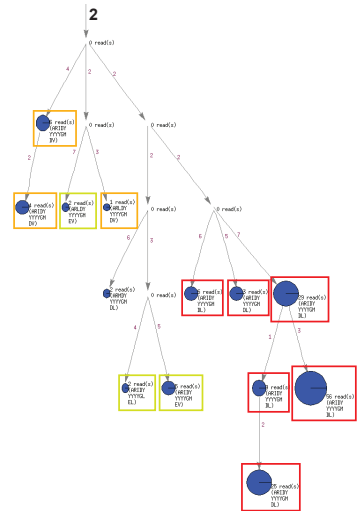

- ARIDY(5)GMDL
- ≥95% similar to ARIDY(5)GMDL
- 90-95% similar to ARIDY(5)GMDL

# S4B

## Sample # 113 [Acute]

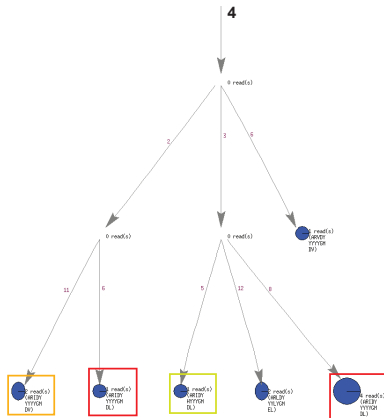

- ARIDY(5)GMDL
- ≥95% similar to ARIDY(5)GMDL
- 90-95% similar to ARIDY(5)GMDL

# S4C

## Sample # 97 [Acute]

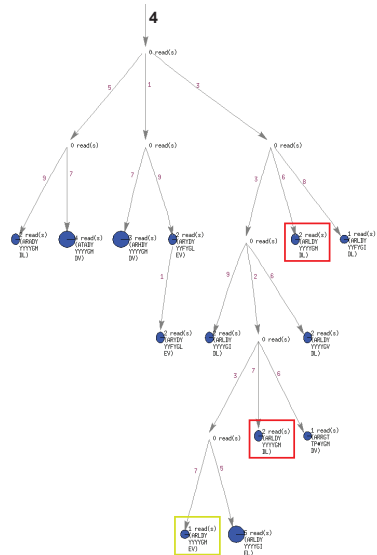

- ARLDY(5)GMDL
- ≥95% similar to ARLDY(5)GMDL
- 90-95% similar to ARLDY(5)GMDL

# S4D

## Sample # 113 [Acute]

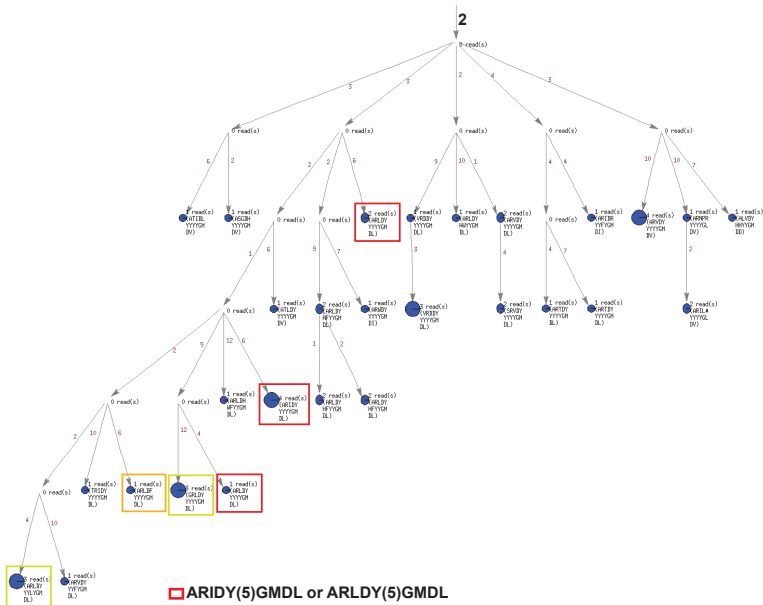

- ARIDY(5)GMDL or ARLDY(5)GMDL
- ≥95% similar to ARIDY(5)GMDL or ARLDY(5)GMDL
- 90-95% similar to ARIDY(5)GMDL or ARLDY(5)GMDL

# S4E

## Sample # 410 [Acute]

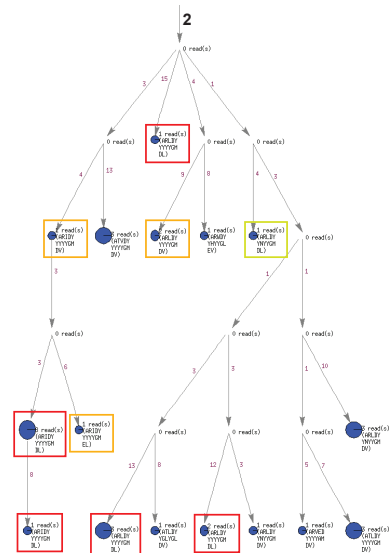

- ARIDY(5)GMDL or ARLDY(5)GMDL
- ≥95% similar to ARIDY(5)GMDL or ARLDY(5)GMDL
- 90-95% similar to ARIDY(5)GMDL or ARLDY(5)GMDL

## S5A

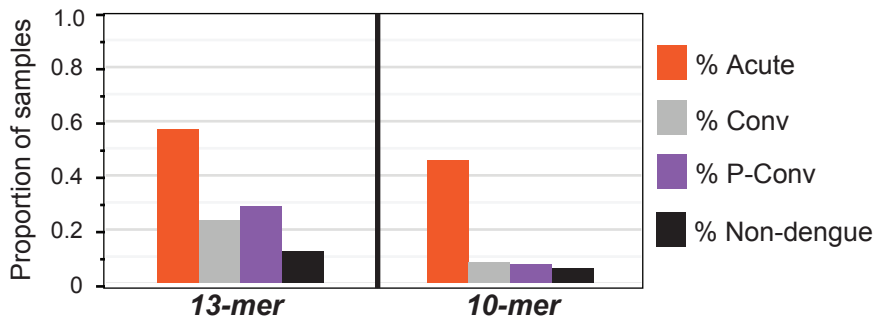

## S5B

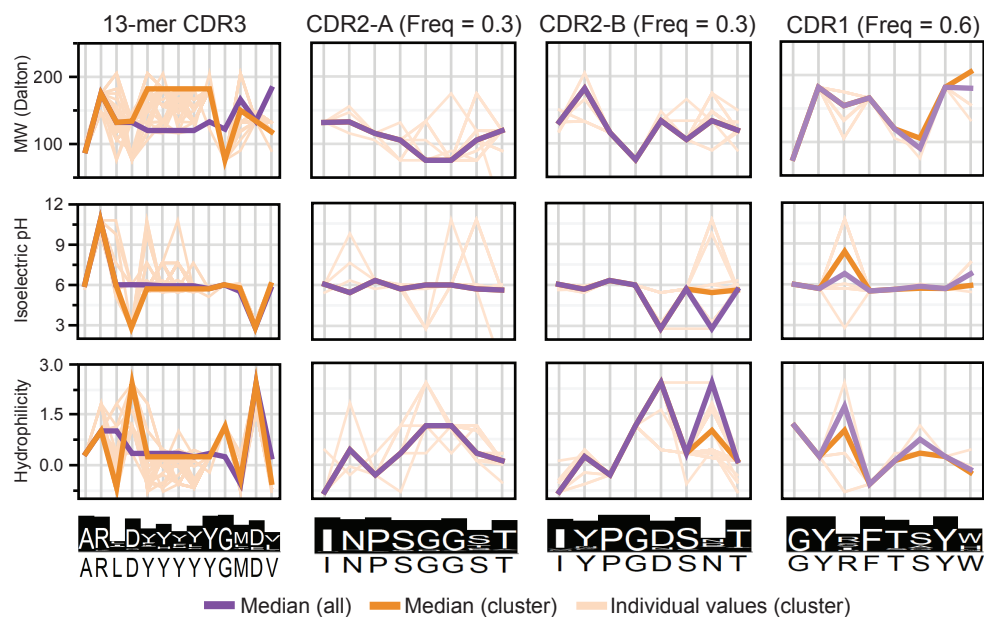

## S5C

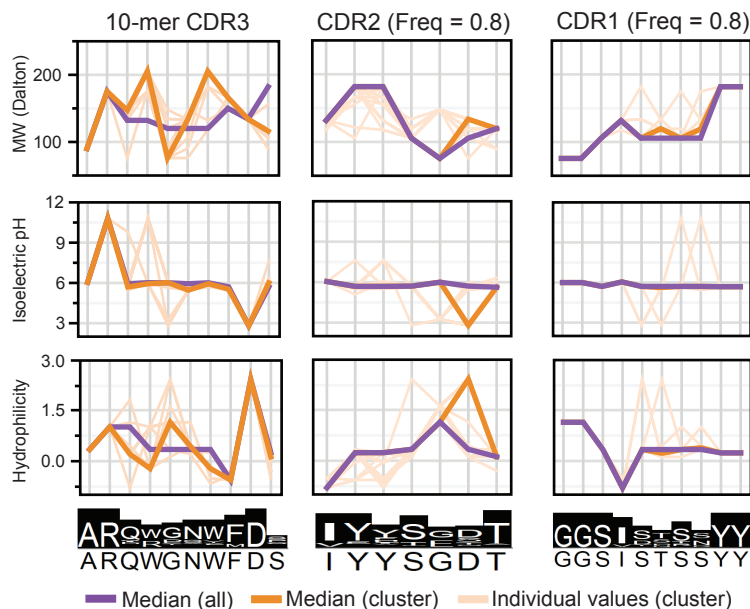



## Supplementary tables

**Table S1, related to Table 1.** *Description of samples used in this study, and read counts per sample pre- and post-filtering.*

| Specimen ID | Disease severity <sup>^</sup> | Serotype | Immune status | Time-point* | # with correct barcode | # parsed by iHMMune-align | # with indels parsed by iHMMune-align | # spam reads (post-parsing) | # in-frame with at least one N1 or N2 base (final count) |
|-------------|-------------------------------|----------|---------------|-------------|------------------------|---------------------------|---------------------------------------|-----------------------------|----------------------------------------------------------|
| 148         | DSS                           | DENV-2   | Secondary     | Acute       | 2319                   | 1461                      | 166                                   | 7                           | 904                                                      |
| 172         | DHF                           | DENV-2   | Primary       | Acute       | 8228                   | 5421                      | 643                                   | 37                          | 3585                                                     |
| 194         | DF                            | DENV-2   | Primary       | Acute       | 4239                   | 2683                      | 257                                   | 33                          | 1993                                                     |
| 199         | DF                            | DENV-2   | Primary       | Acute       | 13417                  | 8392                      | 829                                   | 0                           | 5620                                                     |
| 203         | DF                            | DENV-2   | Secondary     | Acute       | 8371                   | 5245                      | 664                                   | 37                          | 3398                                                     |
| 208         | DF                            | DENV-3   | Primary       | Acute       | 3884                   | 2667                      | 235                                   | 0                           | 2114                                                     |
| 232         | DSS                           | DENV-2   | Secondary     | Acute       | 8623                   | 5289                      | 573                                   | 26                          | 3520                                                     |
| 237         | DF                            | DENV-2   | Secondary     | Acute       | 9251                   | 5748                      | 593                                   | 22                          | 3829                                                     |
| 238         | DF                            | DENV-2   | Secondary     | Acute       | 11067                  | 6965                      | 784                                   | 54                          | 4816                                                     |
| 240         | DF                            | DENV-2   | Secondary     | Acute       | 9468                   | 6154                      | 682                                   | 15                          | 4338                                                     |
| 249         | DF                            | DENV-2   | Secondary     | Acute       | 9082                   | 5451                      | 489                                   | 11                          | 3667                                                     |
| 252         | DF                            | DENV-2   | Secondary     | Acute       | 4800                   | 3161                      | 379                                   | 10                          | 2165                                                     |
| 255         | DSS                           | DENV-2   | Primary       | Acute       | 3802                   | 2350                      | 263                                   | 18                          | 1558                                                     |
| 275         | DSS                           | DENV-2   | Secondary     | Acute       | 3376                   | 2026                      | 228                                   | 5                           | 1317                                                     |
| 276         | DHF                           | DENV-3   | Primary       | Acute       | 4167                   | 2534                      | 264                                   | 28                          | 1663                                                     |
| 287         | DSS                           | DENV-2   | Secondary     | Acute       | 4648                   | 2826                      | 272                                   | 15                          | 1840                                                     |
| 289         | DSS                           | DENV-2   | Secondary     | Acute       | 6275                   | 3864                      | 439                                   | 19                          | 2630                                                     |
| 299         | DSS                           | DENV-2   | Secondary     | Acute       | 5796                   | 3738                      | 407                                   | 22                          | 2604                                                     |
| 301         | DSS                           | DENV-2   | Secondary     | Acute       | 14572                  | 9232                      | 838                                   | 28                          | 6341                                                     |
| 307         | DF                            | DENV-2   | Primary       | Acute       | 4955                   | 3013                      | 295                                   | 26                          | 2011                                                     |
| 311         | DSS                           | DENV-2   | Secondary     | Acute       | 8051                   | 5075                      | 542                                   | 30                          | 3397                                                     |
| 320         | DSS                           | DENV-2   | Secondary     | Acute       | 4846                   | 3026                      | 338                                   | 8                           | 2099                                                     |
| 376         | DHF                           | DENV-3   | Primary       | Acute       | 2719                   | 1638                      | 186                                   | 16                          | 1090                                                     |
| 391         | DHF                           | DENV-3   | Primary       | Acute       | 3947                   | 2429                      | 224                                   | 7                           | 1649                                                     |
| 422         | DF                            | DENV-2   | Primary       | Acute       | 1936                   | 1196                      | 146                                   | 5                           | 769                                                      |
| 444         | DHF                           | DENV-3   | Secondary     | Acute       | 4364                   | 2674                      | 248                                   | 20                          | 1852                                                     |
| 455         | DF                            | DENV-3   | Primary       | Acute       | 5094                   | 3303                      | 259                                   | 32                          | 2165                                                     |
| 479         | DF                            | DENV-3   | Primary       | Acute       | 4350                   | 2816                      | 250                                   | 16                          | 1881                                                     |
| 481         | DF                            | DENV-3   | Secondary     | Acute       | 3762                   | 2503                      | 243                                   | 16                          | 1645                                                     |
| 489         | DF                            | DENV-3   | Secondary     | Acute       | 4580                   | 3065                      | 280                                   | 32                          | 2074                                                     |
| 500         | DF                            | DENV-3   | Secondary     | Acute       | 4658                   | 3114                      | 293                                   | 31                          | 2155                                                     |
| 514         | DF                            | DENV-3   | Secondary     | Acute       | 3610                   | 2364                      | 230                                   | 13                          | 1639                                                     |
| 515         | DF                            | DENV-3   | Secondary     | Acute       | 4212                   | 2731                      | 234                                   | 14                          | 1811                                                     |
| 517         | DHF                           | DENV-3   | Secondary     | Acute       | 3623                   | 2342                      | 248                                   | 6                           | 1635                                                     |
| 520         | DHF                           | DENV-3   | Secondary     | Acute       | 9007                   | 6038                      | 656                                   | 26                          | 3904                                                     |

|     |     |        |           |       |       |      |     |    |      |
|-----|-----|--------|-----------|-------|-------|------|-----|----|------|
| 524 | DSS | DENV-2 | Secondary | Acute | 4071  | 2950 | 313 | 9  | 2075 |
| 529 | DHF | DENV-3 | Primary   | Acute | 9587  | 6032 | 694 | 74 | 3887 |
| 543 | DHF | DENV-3 | Secondary | Acute | 3839  | 2715 | 235 | 15 | 1972 |
| 551 | DHF | DENV-3 | Secondary | Acute | 1951  | 1409 | 161 | 9  | 1000 |
| 555 | DF  | DENV-3 | Primary   | Acute | 9808  | 6448 | 670 | 19 | 4509 |
| 558 | DF  | DENV-3 | Primary   | Acute | 2760  | 1823 | 149 | 6  | 1265 |
| 563 | DF  | DENV-3 | Primary   | Acute | 4848  | 3277 | 289 | 30 | 2308 |
| 569 | DF  | DENV-3 | Secondary | Acute | 2784  | 1779 | 202 | 17 | 1307 |
| 148 | DSS | DENV-2 | Secondary | Conv  | 6502  | 4135 | 511 | 21 | 2723 |
| 172 | DHF | DENV-2 | Primary   | Conv  | 10690 | 6854 | 780 | 21 | 4517 |
| 194 | DF  | DENV-2 | Primary   | Conv  | 12174 | 7942 | 868 | 29 | 5293 |
| 199 | DF  | DENV-2 | Primary   | Conv  | 9605  | 6171 | 649 | 45 | 4180 |
| 203 | DF  | DENV-2 | Secondary | Conv  | 14372 | 8942 | 927 | 74 | 5905 |
| 208 | DF  | DENV-3 | Primary   | Conv  | 8873  | 5596 | 585 | 42 | 3799 |
| 232 | DSS | DENV-2 | Secondary | Conv  | 6542  | 3817 | 360 | 22 | 2638 |
| 237 | DF  | DENV-2 | Secondary | Conv  | 9196  | 5807 | 653 | 37 | 3757 |
| 238 | DF  | DENV-2 | Secondary | Conv  | 7859  | 4899 | 487 | 27 | 3201 |
| 240 | DF  | DENV-2 | Secondary | Conv  | 10512 | 6610 | 743 | 40 | 4416 |
| 249 | DF  | DENV-2 | Secondary | Conv  | 8591  | 5118 | 497 | 25 | 3322 |
| 252 | DF  | DENV-2 | Secondary | Conv  | 3455  | 2180 | 242 | 21 | 1512 |
| 255 | DSS | DENV-2 | Primary   | Conv  | 4650  | 3092 | 285 | 19 | 2065 |
| 265 | DF  | DENV-3 | Primary   | Conv  | 8736  | 5498 | 595 | 24 | 3835 |
| 275 | DSS | DENV-2 | Secondary | Conv  | 3941  | 2426 | 268 | 11 | 1543 |
| 276 | DHF | DENV-3 | Primary   | Conv  | 5051  | 3068 | 291 | 21 | 2075 |
| 287 | DSS | DENV-2 | Secondary | Conv  | 5611  | 3135 | 277 | 27 | 2103 |
| 289 | DSS | DENV-2 | Secondary | Conv  | 5788  | 3730 | 358 | 23 | 2467 |
| 299 | DSS | DENV-2 | Secondary | Conv  | 5232  | 3300 | 333 | 21 | 2218 |
| 301 | DSS | DENV-2 | Secondary | Conv  | 7320  | 4658 | 422 | 28 | 3153 |
| 376 | DHF | DENV-3 | Primary   | Conv  | 3354  | 2055 | 182 | 13 | 1396 |
| 422 | DF  | DENV-2 | Primary   | Conv  | 2029  | 1262 | 132 | 12 | 916  |
| 444 | DHF | DENV-3 | Secondary | Conv  | 4991  | 3098 | 258 | 26 | 2200 |
| 455 | DF  | DENV-3 | Primary   | Conv  | 4811  | 3183 | 302 | 6  | 2075 |
| 479 | DF  | DENV-3 | Primary   | Conv  | 4523  | 2957 | 326 | 17 | 1938 |
| 481 | DF  | DENV-3 | Secondary | Conv  | 4016  | 2736 | 270 | 12 | 1875 |
| 489 | DF  | DENV-3 | Secondary | Conv  | 5537  | 3678 | 364 | 14 | 2450 |
| 500 | DF  | DENV-3 | Secondary | Conv  | 4036  | 2690 | 236 | 16 | 1835 |
| 514 | DF  | DENV-3 | Secondary | Conv  | 3869  | 2488 | 225 | 14 | 1735 |
| 515 | DF  | DENV-3 | Secondary | Conv  | 3588  | 2261 | 239 | 8  | 1519 |
| 517 | DHF | DENV-3 | Secondary | Conv  | 3970  | 2510 | 243 | 11 | 1738 |
| 520 | DHF | DENV-3 | Secondary | Conv  | 3036  | 2125 | 220 | 8  | 1481 |
| 524 | DSS | DENV-2 | Secondary | Conv  | 3206  | 2271 | 240 | 8  | 1565 |
| 529 | DHF | DENV-3 | Primary   | Conv  | 3532  | 2468 | 216 | 5  | 1689 |
| 543 | DHF | DENV-3 | Secondary | Conv  | 3777  | 2709 | 247 | 20 | 1942 |

|     |     |        |           |        |       |      |      |    |      |
|-----|-----|--------|-----------|--------|-------|------|------|----|------|
| 551 | DHF | DENV-3 | Secondary | Conv   | 2225  | 1622 | 143  | 5  | 1200 |
| 555 | DF  | DENV-3 | Primary   | Conv   | 4099  | 2733 | 279  | 25 | 1892 |
| 563 | DF  | DENV-3 | Primary   | Conv   | 5615  | 3862 | 375  | 25 | 2606 |
| 569 | DF  | DENV-3 | Secondary | Conv   | 4785  | 3182 | 268  | 23 | 2338 |
| 148 | DSS | DENV-2 | Secondary | P-Conv | 6165  | 4013 | 523  | 13 | 2564 |
| 172 | DHF | DENV-2 | Primary   | P-Conv | 12105 | 7622 | 843  | 30 | 5038 |
| 194 | DF  | DENV-2 | Primary   | P-Conv | 11953 | 7452 | 780  | 40 | 5047 |
| 199 | DF  | DENV-2 | Primary   | P-Conv | 9188  | 5809 | 598  | 21 | 3835 |
| 203 | DF  | DENV-2 | Secondary | P-Conv | 15646 | 9811 | 1022 | 61 | 6506 |
| 208 | DF  | DENV-3 | Primary   | P-Conv | 9252  | 5739 | 608  | 41 | 3893 |
| 232 | DSS | DENV-2 | Secondary | P-Conv | 7328  | 4303 | 490  | 24 | 2890 |
| 237 | DF  | DENV-2 | Secondary | P-Conv | 9909  | 6311 | 684  | 27 | 4042 |
| 238 | DF  | DENV-2 | Secondary | P-Conv | 7288  | 4540 | 498  | 22 | 3100 |
| 240 | DF  | DENV-2 | Secondary | P-Conv | 10935 | 6883 | 787  | 29 | 4563 |
| 249 | DF  | DENV-2 | Secondary | P-Conv | 7609  | 4606 | 458  | 27 | 3199 |
| 252 | DF  | DENV-2 | Secondary | P-Conv | 3664  | 2318 | 256  | 21 | 1562 |
| 255 | DSS | DENV-2 | Primary   | P-Conv | 4797  | 3086 | 323  | 15 | 1999 |
| 265 | DF  | DENV-3 | Primary   | P-Conv | 11336 | 7062 | 816  | 30 | 4474 |
| 275 | DSS | DENV-2 | Secondary | P-Conv | 3886  | 2418 | 246  | 11 | 1582 |
| 276 | DHF | DENV-3 | Primary   | P-Conv | 5084  | 3077 | 308  | 22 | 2008 |
| 287 | DSS | DENV-2 | Secondary | P-Conv | 5204  | 3055 | 265  | 16 | 2085 |
| 289 | DSS | DENV-2 | Secondary | P-Conv | 5938  | 3682 | 401  | 18 | 2485 |
| 299 | DSS | DENV-2 | Secondary | P-Conv | 4802  | 3064 | 304  | 14 | 2010 |
| 301 | DSS | DENV-2 | Secondary | P-Conv | 7289  | 4743 | 440  | 30 | 3192 |
| 307 | DF  | DENV-2 | Primary   | P-Conv | 5082  | 3053 | 257  | 34 | 2003 |
| 311 | DSS | DENV-2 | Secondary | P-Conv | 1226  | 768  | 74   | 7  | 449  |
| 320 | DSS | DENV-2 | Secondary | P-Conv | 3435  | 1673 | 201  | 6  | 1178 |
| 376 | DHF | DENV-3 | Primary   | P-Conv | 3434  | 2098 | 210  | 9  | 1387 |
| 391 | DHF | DENV-3 | Primary   | P-Conv | 4047  | 2503 | 255  | 16 | 1708 |
| 422 | DF  | DENV-2 | Primary   | P-Conv | 3782  | 2331 | 242  | 11 | 1606 |
| 444 | DHF | DENV-3 | Secondary | P-Conv | 4481  | 2758 | 259  | 33 | 1872 |
| 455 | DF  | DENV-3 | Primary   | P-Conv | 4090  | 2650 | 246  | 14 | 1720 |
| 479 | DF  | DENV-3 | Primary   | P-Conv | 6249  | 4148 | 354  | 27 | 2717 |
| 481 | DF  | DENV-3 | Secondary | P-Conv | 3822  | 2531 | 239  | 32 | 1713 |
| 489 | DF  | DENV-3 | Secondary | P-Conv | 4016  | 2703 | 276  | 10 | 1805 |
| 500 | DF  | DENV-3 | Secondary | P-Conv | 4801  | 3211 | 275  | 16 | 2291 |
| 514 | DF  | DENV-3 | Secondary | P-Conv | 4345  | 2749 | 233  | 8  | 1877 |
| 515 | DF  | DENV-3 | Secondary | P-Conv | 5580  | 3582 | 392  | 17 | 2358 |
| 517 | DHF | DENV-3 | Secondary | P-Conv | 3617  | 2361 | 216  | 17 | 1678 |
| 520 | DHF | DENV-3 | Secondary | P-Conv | 3549  | 2532 | 266  | 12 | 1784 |
| 524 | DSS | DENV-2 | Secondary | P-Conv | 3636  | 2581 | 264  | 9  | 1758 |
| 529 | DHF | DENV-3 | Primary   | P-Conv | 2248  | 1570 | 170  | 14 | 1087 |
| 543 | DHF | DENV-3 | Secondary | P-Conv | 3678  | 2713 | 256  | 13 | 1953 |

|                  |     |        |           |         |       |       |      |     |       |
|------------------|-----|--------|-----------|---------|-------|-------|------|-----|-------|
| 551              | DHF | DENV-3 | Secondary | P-Conv  | 2227  | 1623  | 138  | 5   | 1133  |
| 555              | DF  | DENV-3 | Primary   | P-Conv  | 3765  | 2592  | 241  | 18  | 1799  |
| 558              | DF  | DENV-3 | Primary   | P-Conv  | 3644  | 2451  | 250  | 9   | 1706  |
| 563              | DF  | DENV-3 | Primary   | P-Conv  | 4584  | 3124  | 272  | 17  | 2180  |
| 569              | DF  | DENV-3 | Secondary | P-Conv  | 4054  | 2554  | 204  | 26  | 1858  |
| 171              | n/a | n/a    | n/a       | Febrile | 3155  | 2174  | 234  | 22  | 1554  |
| 207              | n/a | n/a    | n/a       | Febrile | 4149  | 2869  | 245  | 7   | 1973  |
| 209              | n/a | n/a    | n/a       | Febrile | 3664  | 2317  | 254  | 18  | 1596  |
| 220              | n/a | n/a    | n/a       | Febrile | 3304  | 2084  | 183  | 29  | 1460  |
| 330              | n/a | n/a    | n/a       | Febrile | 1914  | 1163  | 107  | 3   | 807   |
| 332              | n/a | n/a    | n/a       | Febrile | 1851  | 1121  | 150  | 2   | 771   |
| 345              | n/a | n/a    | n/a       | Febrile | 2004  | 1232  | 134  | 14  | 872   |
| 1503             | n/a | n/a    | n/a       | Healthy | 2763  | 1849  | 212  | 10  | 1272  |
| 223              | n/a | n/a    | n/a       | Healthy | 2072  | 1250  | 132  | 7   | 881   |
| 2603             | n/a | n/a    | n/a       | Healthy | 2663  | 1700  | 168  | 11  | 1211  |
| 331              | n/a | n/a    | n/a       | Healthy | 649   | 422   | 61   | 2   | 311   |
| 4057             | n/a | n/a    | n/a       | Healthy | 3033  | 2018  | 173  | 16  | 1439  |
| 4431             | n/a | n/a    | n/a       | Healthy | 2560  | 1718  | 184  | 5   | 1224  |
| 4468             | n/a | n/a    | n/a       | Healthy | 2985  | 1870  | 185  | 5   | 1303  |
| 4873             | n/a | n/a    | n/a       | Healthy | 1672  | 1033  | 105  | 8   | 715   |
| 55 <sup>s</sup>  | DF  | DENV-2 | Primary   | Acute   | 14522 | 12986 | 1230 | 87  | 8246  |
| 97 <sup>s</sup>  | DSS | DENV-2 | Secondary | Acute   | 10935 | 9699  | 844  | 42  | 6461  |
| 113 <sup>s</sup> | DF  | DENV-2 | Secondary | Acute   | 13171 | 11044 | 1118 | 75  | 7267  |
| 114 <sup>s</sup> | DF  | DENV-2 | Secondary | Acute   | 10832 | 8971  | 933  | 37  | 5985  |
| 128 <sup>s</sup> | DHF | DENV-2 | Secondary | Acute   | 9254  | 7282  | 718  | 27  | 4622  |
| 146 <sup>s</sup> | DSS | DENV-2 | Secondary | Acute   | 10384 | 9131  | 916  | 31  | 5843  |
| 188 <sup>s</sup> | DHF | DENV-2 | Secondary | Acute   | 7841  | 6931  | 650  | 50  | 4431  |
| 189 <sup>s</sup> | DSS | DENV-2 | Secondary | Acute   | 12198 | 10322 | 1086 | 41  | 6675  |
| 212 <sup>s</sup> | DSS | DENV-2 | Secondary | Acute   | 28269 | 21941 | 2237 | 161 | 14118 |
| 308 <sup>s</sup> | DSS | DENV-2 | Secondary | Acute   | 10351 | 9145  | 855  | 112 | 6212  |
| 313 <sup>s</sup> | DF  | DENV-2 | Secondary | Acute   | 23816 | 18908 | 1795 | 195 | 12088 |
| 314 <sup>s</sup> | DHF | DENV-2 | Secondary | Acute   | 16626 | 14413 | 1398 | 70  | 9417  |
| 341 <sup>s</sup> | DHF | DENV-2 | Secondary | Acute   | 15005 | 12157 | 1243 | 66  | 8138  |
| 364 <sup>s</sup> | DHF | DENV-2 | Secondary | Acute   | 13020 | 10670 | 1098 | 112 | 7040  |
| 410 <sup>s</sup> | DF  | DENV-2 | Secondary | Acute   | 18782 | 15771 | 1632 | 61  | 10677 |
| 524 <sup>s</sup> | DSS | DENV-2 | Secondary | Acute   | 12908 | 11075 | 1224 | 63  | 7015  |

\*Conv, Convalescent. P-Conv, Post-convalescent. Febrile, Non-dengue febrile

^DF, dengue fever. DHF, dengue hemorrhagic fever. DSS, dengue shock syndrome. n/a, not available

<sup>s</sup>2<sup>nd</sup> Test set samples

**Table S2, related to Figure 1. *P*(collision) scores used in Figure 1.**

| Patient ID | Acute    | Conv*    | P-Conv   | Non-dengue febrile | Healthy  |
|------------|----------|----------|----------|--------------------|----------|
| 148        | 3.67E-03 | 9.70E-04 | 9.13E-04 |                    |          |
| 172        | 8.62E-05 | 1.04E-05 | 1.57E-05 |                    |          |
| 194        | 3.89E-06 | 3.62E-05 | 1.81E-05 |                    |          |
| 203        | 3.10E-05 | 1.12E-06 | 2.36E-06 |                    |          |
| 232        | 6.00E-06 | 6.63E-06 | 1.20E-05 |                    |          |
| 237        | 1.29E-04 | 6.35E-07 | 1.09E-07 |                    |          |
| 238        | 5.76E-05 | 9.97E-07 | 9.78E-07 |                    |          |
| 240        | 1.20E-03 | 9.09E-07 | 2.26E-06 |                    |          |
| 249        | 5.19E-05 | 1.09E-06 | 3.98E-07 |                    |          |
| 252        | 4.13E-05 | 1.00E-08 | 1.00E-08 |                    |          |
| 255        | 8.20E-05 | 1.00E-08 | 1.00E-08 |                    |          |
| 275        | 9.77E-06 | 1.50E-06 | 1.00E-08 |                    |          |
| 287        | 1.41E-04 | 1.58E-05 | 1.70E-05 |                    |          |
| 289        | 1.33E-04 | 1.83E-06 | 1.00E-08 |                    |          |
| 299        | 1.23E-05 | 3.83E-07 | 4.59E-07 |                    |          |
| 301        | 6.29E-06 | 1.00E-08 | 1.00E-08 |                    |          |
| 307        | 1.88E-06 | n/a      | 4.64E-07 |                    |          |
| 311        | 8.70E-06 | n/a      | n/a      |                    |          |
| 320        | 7.77E-05 | n/a      | 1.00E-08 |                    |          |
| 422        | 1.99E-05 | 1.00E-08 | 1.00E-08 |                    |          |
| 524        | 4.63E-05 | 1.00E-04 | 6.41E-07 |                    |          |
| 208        | 3.38E-05 | 1.05E-06 | 1.65E-06 |                    |          |
| 265        | n/a      | 2.22E-06 | 3.55E-06 |                    |          |
| 276        | 1.94E-06 | 4.23E-07 | 8.72E-07 |                    |          |
| 376        | 1.00E-08 | 1.03E-06 | 2.03E-06 |                    |          |
| 391        | 7.48E-05 | n/a      | 6.97E-07 |                    |          |
| 444        | 8.37E-05 | 1.01E-04 | 2.14E-06 |                    |          |
| 520        | 4.48E-04 | 1.00E-08 | 6.42E-07 |                    |          |
| 543        | 1.63E-06 | 2.22E-06 | 5.56E-07 |                    |          |
| 555        | 8.88E-06 | 5.69E-07 | 5.65E-06 |                    |          |
| 558        | 3.80E-06 | n/a      | 3.76E-06 |                    |          |
| 171        |          |          |          | 1.18E-05           |          |
| 207        |          |          |          | 1.75E-05           |          |
| 209        |          |          |          | 3.60E-05           |          |
| 220        |          |          |          | 2.08E-06           |          |
| 330        |          |          |          | 1.27E-05           |          |
| 332        |          |          |          | 0.00E+00           |          |
| 345        |          |          |          | 6.30E-05           |          |
| 223        |          |          |          |                    | 1.47E-04 |
| 331        |          |          |          |                    | 0.00E+00 |

|      |          |
|------|----------|
| 1503 | 0.00E+00 |
| 2603 | 1.46E-06 |
| 4057 | 0.00E+00 |
| 4431 | 0.00E+00 |
| 4468 | 1.16E-06 |
| 4873 | 0.00E+00 |

n/a, not available

\*Only convalescent samples that were collected 7-21 days post-symptom onset were considered for this analysis.

**Table S3, related to Figure 2.** *P-values, q-values and L1-regularized log odds ratios associated with convergent CDR3 regions and CDR3 clusters that were significantly more prevalent in acute dengue compared to non-dengue cases.*

*Fisher's exact P-values, Benjamini-Hochberg q-values and L1-regularized log odds ratios for CDR3 regions that were significantly more prevalent in acute dengue compared to non-dengue cases*

| <b>CDR3</b>   | <b>Fisher exact P-value</b> | <b>Benjamini-Hochberg q-value</b> | <b>Adjusted log odds ratios</b> | <b>Odds ratios</b> |
|---------------|-----------------------------|-----------------------------------|---------------------------------|--------------------|
| ARLDYYYYYGMDL | 4.715e-8                    | 0.0001572                         | 0.59                            | 1.805              |
| ARIDYYYYYGMDL | 0.0000001192                | 0.000397                          |                                 |                    |
| ARLDYHYYGMDL  | 0.0000001192                | 0.000397                          |                                 |                    |
| ARLDYHYYGMDV  | 0.0000001192                | 0.000397                          | 0.182                           | 1.199              |
| ARLDYYYYYGMDI | 0.0000002967                | 0.000988                          |                                 |                    |
| ARQWGNWFDS    | 0.0000007279                | 0.002421                          |                                 |                    |
| ARQAGNWFDS    | 0.0000007279                | 0.002421                          |                                 |                    |
| ARLDYHNYGMDV  | 0.0000007279                | 0.002421                          | 0.223                           | 1.25               |
| ARQTGNWFDS    | 0.0000007279                | 0.002421                          | 0.29                            | 1.336              |
| ARQIGNWFDP    | 0.000001632                 | 0.005426                          |                                 |                    |
| ARLDYYSYGM DL | 0.000001761                 | 0.005841                          |                                 |                    |
| ARQDYYYYYGMDL | 0.000001761                 | 0.005841                          |                                 |                    |
| ARQAGNWFDP    | 0.000001761                 | 0.005841                          |                                 |                    |
| ARQIGNWFDS    | 0.000001761                 | 0.005841                          |                                 |                    |
| ARLDYNYYGMDL  | 0.000001761                 | 0.005841                          |                                 |                    |
| ARLDYNYYGMDV  | 0.000001761                 | 0.005841                          |                                 |                    |
| ARQVGNWFDS    | 0.000001761                 | 0.005841                          |                                 |                    |
| ARQLGNWFDS    | 0.000001761                 | 0.005841                          | 0.048                           | 1.049              |
| ARQRGNWFDP    | 0.000003847                 | 0.01276                           | 0.703                           | 2.019              |
| ARLDYYQYYGMDL | 0.000004202                 | 0.01388                           |                                 |                    |
| AREDYYYYYGMDL | 0.000004202                 | 0.01388                           |                                 |                    |
| ARQRGNWFDS    | 0.000004202                 | 0.01388                           |                                 |                    |
| ARLDYFYYGMDL  | 0.000004202                 | 0.01388                           |                                 |                    |
| ARIDYHYYGMDV  | 0.000004202                 | 0.01388                           |                                 |                    |
| ARQSGNWFDS    | 0.000004202                 | 0.01388                           |                                 |                    |
| ARQKGNWFDS    | 0.000004202                 | 0.01388                           |                                 |                    |
| ARQMGNWFDP    | 0.000004202                 | 0.01388                           |                                 |                    |
| ATLDYYYYYGMDV | 0.000004202                 | 0.01388                           |                                 |                    |
| ARLDYHYYGMDL  | 0.000004202                 | 0.01388                           |                                 |                    |
| ARLDYYLYGMDV  | 0.000004202                 | 0.01388                           |                                 |                    |
| ARIDYHYYGMDV  | 0.000004202                 | 0.01388                           |                                 |                    |
| ARIDYYYYYGMDV | 0.000004655                 | 0.01537                           | 0.577                           | 1.781              |
| ATIDYYYYYGMDV | 0.000009896                 | 0.03256                           |                                 |                    |
| ARQSGNWFDP    | 0.000009896                 | 0.03256                           |                                 |                    |
| ARMDYYYYYGMDL | 0.000009896                 | 0.03256                           |                                 |                    |
| ARLDYYLYGMDL  | 0.000009896                 | 0.03256                           |                                 |                    |
| ARLDYNYYGMDL  | 0.000009896                 | 0.03256                           |                                 |                    |
| ARQMGNWFDS    | 0.000009896                 | 0.03256                           |                                 |                    |
| ARQLGNWFDP    | 0.000009896                 | 0.03256                           |                                 |                    |
| ARLDYHFYYGMDV | 0.000009896                 | 0.03256                           |                                 |                    |

|                |             |         |       |       |
|----------------|-------------|---------|-------|-------|
| ARCDYYYYYGMDL  | 0.000009896 | 0.03256 |       |       |
| ARLDFYYYYYGMDL | 0.000009896 | 0.03256 |       |       |
| ARQNGNWFDS     | 0.000009896 | 0.03256 |       |       |
| ARYDYYYYYGMDL  | 0.000009896 | 0.03256 |       |       |
| ARADYYYYYGMDL  | 0.000009896 | 0.03256 |       |       |
| ARGGYSYD       |             |         | 0.553 | 1.739 |
| ARGPTLDY       |             |         | 0.371 | 1.449 |
| ARGGPYYFDY     |             |         | 0.323 | 1.382 |
| ARQWGNWFDR     |             |         | 0.212 | 1.236 |
| ARQYGNFYD      |             |         | 0.149 | 1.161 |
| ARDGGSYYFDY    |             |         | 0.098 | 1.102 |
| ARGLTGFYD      |             |         | 0.074 | 1.077 |
| ARYYFDY        |             |         | 0.023 | 1.023 |
| ARAGSYFDY      |             |         | 0.011 | 1.011 |
| ARVYYYYYGMDV   |             |         | 0.011 | 1.011 |

*L1-regularized logs odds ratios for dengue-associated CDR3 clusters identified by logistic regression*

| <b>Representative CDR3 (# CDR3 regions in cluster)</b> | <b>Adjusted log odds ratios</b> | <b>Odds ratios</b> | <b>Cluster Members</b>                                                                                                                                                                                                                                                                                                                                                                                                                                                                                          |
|--------------------------------------------------------|---------------------------------|--------------------|-----------------------------------------------------------------------------------------------------------------------------------------------------------------------------------------------------------------------------------------------------------------------------------------------------------------------------------------------------------------------------------------------------------------------------------------------------------------------------------------------------------------|
| ARIDYHHYGM DL (20)                                     | 1.742                           | 5.710              | ARIDYHHYGM DL, ARLDYHQYYGM DL, AREDYYYYYGMDL, ARQDYYYYYGMDL, ARVDYYYYYGMDL, ARIDYYYYYGMDL, ARMDYYYYYGMDL, ARLDYHYYGM DL, ARLDYHNYGM DL, ARLDYHHYGM DL, ARCDYYYYYGMDL, ARTDYYYYYGMDL, ARIDYHSYGM DL, ARYDYYYYYGMDL, ARLDYHHYGM DL, ARSDYHHYGM DL, ARDDYHSYGM DL, ARCDYHYYGM DL, ARIDYHQYYGM DL, ARADYYYYYGMDL                                                                                                                                                                                                    |
| ARGYYYGGMDV (2)                                        | 1.561                           | 4.762              | ARGYYYGGMDV, VRGYYYGGMDV                                                                                                                                                                                                                                                                                                                                                                                                                                                                                        |
| AREPHFDY (2)                                           | 1.460                           | 4.305              | AREPHFDY, ARDPHFDY                                                                                                                                                                                                                                                                                                                                                                                                                                                                                              |
| ARQWENWFDS (42)                                        | 1.415                           | 4.115              | ARQWENWFDS, ARQVRNWFDS, ARQWGNWFDS, ARQLRNWFDS, ARQDRNWFDS, ARQIRNWFDS, ARQQRNWFDS, ARQEKWFDS, ARQRKNWFDS, ARQDNWFDS, ARQWTNWFDS, ARQWNNWFDS, ARQRDNWFDS, ARQLENWFDS, ARQVKNWFDS, ARQDENWFDS, ARQKRNWFDS, ARQDSNWFDS, ARQVSNWFDS, ARQVTNWFDS, ARQRQNFDS, ARQQKNWFDS, ARQERNWFDS, ARQLNNWFDS, ARQSKNWFDS, ARQNQNWFDS, ARQQENWFDS, ARQNSNWFDS, ARQRTNWFDS, ARQANWFDS, ARQFTNWFDS, ARQSTNWFDS, ARQYTNWFDS, ARQRRNWFDS, ARQTDNWFDS, ARQISNWFDS, ARQDQNFDS, ARQNTNWFDS, ARQTQNFDS, ARQYNWFDS, ARQASNWFDS, ARQHTNWFDS |
| ARGLGRFDP (1)                                          | 1.332                           | 3.790              | ARGLGRFDP                                                                                                                                                                                                                                                                                                                                                                                                                                                                                                       |
| ARAGSYFDY (5)                                          | 1.274                           | 3.575              | ARAGSYFDY, AREGPYYFDY, ARGGPYYFDY, ARAGPYYFDY, ARAGAYYFDY                                                                                                                                                                                                                                                                                                                                                                                                                                                       |
| ASLDYHFFYGM DV (11)                                    | 0.901                           | 2.462              | ASLDYHFFYGM DV, ATLDYHFFYGM DV, ARLDYHHYGM DV, ARLDYHNYGM DV, ARLDYHYYGM DV, ATLDYHNYGM DV, ARLDYHFFYGM DV, ATLDYHSYGM DV, ARLDYHSYGM DV, ARLDYHQYYGM DV, ARLDYHTYGM DV                                                                                                                                                                                                                                                                                                                                         |



|                     |       |       |                                                                                                                                                |
|---------------------|-------|-------|------------------------------------------------------------------------------------------------------------------------------------------------|
| ARDYYYYDSSGYFDY (1) | 0.448 | 1.565 | ARDYYYYDSSGYFDY                                                                                                                                |
| AREYMDV (2)         | 0.360 | 1.433 | AREYMDV, AREDAMDV                                                                                                                              |
| ARQITNWFDA (11)     | 0.160 | 1.174 | ARQITNWFDA, ARQITNWFDP, ARQWTNWFDA, ARQWTNWFDP, ARQTTNWFDA, ARQVTNWFDL, ARQLTNWFDL, ARQWTNWFDL, ARQTTNWFDS, ARQVTNWFDA, ARQWTNWFDR             |
| ARGTGTLDY (2)       | 0.101 | 1.106 | ARGTGTLDY, ARGTGTSY                                                                                                                            |
| ARQSGNYFDY (12)     | 0.056 | 1.057 | ARQSGNYFDY, ARQSGNYFDH, ARQLGNYFDR, ARQFGNYFDA, ARQSGNYFDS, ARQSGNYFDA, ARQSGNYFDD, ARQSGNYFDN, ARQSGNYFDF, ARQLGNYFDS, ARQTGNYFDS, ARQFGNYFDN |

*Comparison of various measures attributed to CDR3 regions identified using the cross-validation algorithm*

| CDR3           | Average prevalence* (mismatch) | Average prevalence* (amino acid similarity) | Benjamini-Hochberg q-value | Adjusted log odds ratio |                 |
|----------------|--------------------------------|---------------------------------------------|----------------------------|-------------------------|-----------------|
|                |                                |                                             |                            | Singleton               | Post-clustering |
| ARLDYYYYYGMDL  | 0.398                          | 0.367                                       | 0.000157                   | 0.590                   | 1.742           |
| ARIDYYYYYGMDL  | 0.383                          | 0.383                                       | 0.000397                   | -                       | 1.742           |
| ARQIGNWFDP     | 0.377                          | 0.134                                       | 0.00543                    | -                       | -               |
| ARLDYHYYYYGMDV | 0.357                          | 0.170                                       | 0.000397                   | 0.182                   | 0.901           |
| ARLDYHNYYGMDV  | 0.326                          | 0.228                                       | 0.00242                    | 0.223                   | 0.901           |

\*Average prevalence in acute dengue cases in the training, 1<sup>st</sup> test and 2<sup>nd</sup> test sets

**Table S4, related to Figure 5.** 10-mer and 13-mer CDR3 clusters with significant Fisher's *P* values ( $< 0.05$ ) for prevalence comparisons between acute and post-convalescent samples, or between acute and non-dengue samples.

| CDR3 length | Cluster # | # CDR3 regions | Acute | Conv | P-Conv | Non-Dengue | Fisher's <i>P</i> (Acute / P-Conv) | Fisher's <i>P</i> (Acute / Non-Dengue) | Clusters highlighted in Figure 5** |
|-------------|-----------|----------------|-------|------|--------|------------|------------------------------------|----------------------------------------|------------------------------------|
| 10          | 386       | 48             | 17    | 3    | 4      | 2          | 2.29E-04                           | 7.29E-07                               | **                                 |
| 10          | 197       | 27             | 14    | 1    | 1      | 2          | 5.70E-05                           | 2.33E-05                               |                                    |
| 10          | 69        | 20             | 11    | 3    | 1      | 1          | 8.33E-04                           | 1.12E-04                               | **                                 |
| 10          | 284       | 14             | 9     | 2    | 2      | 0          | 1.89E-02                           | 1.24E-04                               |                                    |
| 10          | 353       | 8              | 6     | 1    | 0      | 0          | 7.42E-03                           | 3.00E-03                               |                                    |
| 10          | 286       | 8              | 6     | 2    | 1      | 0          | 4.38E-02                           | 3.00E-03                               |                                    |
| 10          | 193       | 8              | 5     | 0    | 1      | 0          | 8.89E-02                           | 8.29E-03                               |                                    |
| 10          | 143       | 7              | 4     | 2    | 1      | 0          | 1.74E-01                           | 2.25E-02                               |                                    |
| 10          | 376       | 5              | 4     | 0    | 0      | 0          | 4.08E-02                           | 2.25E-02                               |                                    |
| 10          | 350       | 6              | 4     | 0    | 0      | 0          | 4.08E-02                           | 2.25E-02                               | **                                 |
| 10          | 40        | 6              | 4     | 1    | 0      | 0          | 4.08E-02                           | 2.25E-02                               |                                    |
| 10          | 32        | 7              | 4     | 1    | 0      | 1          | 4.08E-02                           | 7.91E-02                               |                                    |
|             |           |                |       |      |        |            |                                    |                                        |                                    |
| 13          | 985       | 36             | 14    | 3    | 0      | 0          | 1.45E-05                           | 2.80E-06                               |                                    |
| 13          | 2227      | 46             | 13    | 2    | 2      | 2          | 1.65E-03                           | 4.23E-04                               | **                                 |
| 13          | 1254      | 12             | 7     | 2    | 0      | 2          | 5.51E-03                           | 7.32E-02                               |                                    |
| 13          | 1215      | 21             | 0     | 4    | 7      | 9          | 1.21E-02                           | 4.12E-03                               |                                    |
| 13          | 1050      | 5              | 5     | 0    | 0      | 0          | 2.61E-02                           | 1.49E-02                               |                                    |
| 13          | 2562      | 11             | 0     | 1    | 6      | 4          | 2.61E-02                           | 1.27E-01                               |                                    |
| 13          | 1111      | 16             | 10    | 3    | 3      | 0          | 3.85E-02                           | 1.52E-04                               | **                                 |
| 13          | 2847      | 28             | 2     | 8    | 9      | 7          | 4.92E-02                           | 2.91E-01                               |                                    |
| 13          | 2270      | 142            | 22    | 12   | 14     | 8          | 8.34E-02                           | 1.55E-04                               | **                                 |
| 13          | 305       | 16             | 0     | 1    | 3      | 11         | 2.41E-01                           | 1.02E-03                               |                                    |
| 13          | 1716      | 13             | 0     | 2    | 3      | 7          | 2.41E-01                           | 1.63E-02                               |                                    |
| 13          | 544       | 20             | 0     | 4    | 5      | 6          | 5.54E-02                           | 3.23E-02                               |                                    |
| 13          | 138       | 11             | 0     | 1    | 2      | 6          | 4.94E-01                           | 3.23E-02                               |                                    |
| 13          | 1519      | 13             | 0     | 1    | 1      | 6          | 1.00E+00                           | 3.23E-02                               |                                    |
| 13          | 2559      | 4              | 4     | 0    | 0      | 0          | 5.54E-02                           | 3.56E-02                               |                                    |
| 13          | 815       | 12             | 1     | 3    | 0      | 8          | 4.94E-01                           | 4.09E-02                               |                                    |
| 13          | 2337      | 13             | 1     | 1    | 0      | 8          | 4.94E-01                           | 4.09E-02                               |                                    |
| 13          | 943       | 16             | 1     | 1    | 3      | 8          | 6.16E-01                           | 4.09E-02                               |                                    |

\*\*These clusters contain 13-mer and 10-mer CDR3 regions that were identified by mismatch cross-validation (highlighted in **Figure 5**, with members from other clusters faded).
